# Supplementary material
Source: Springer Nature journal article supplement (https://www.springermedizin.de/resource/supplementary/12943_2010_613_MOESM18_ESM.pdf/9555110)

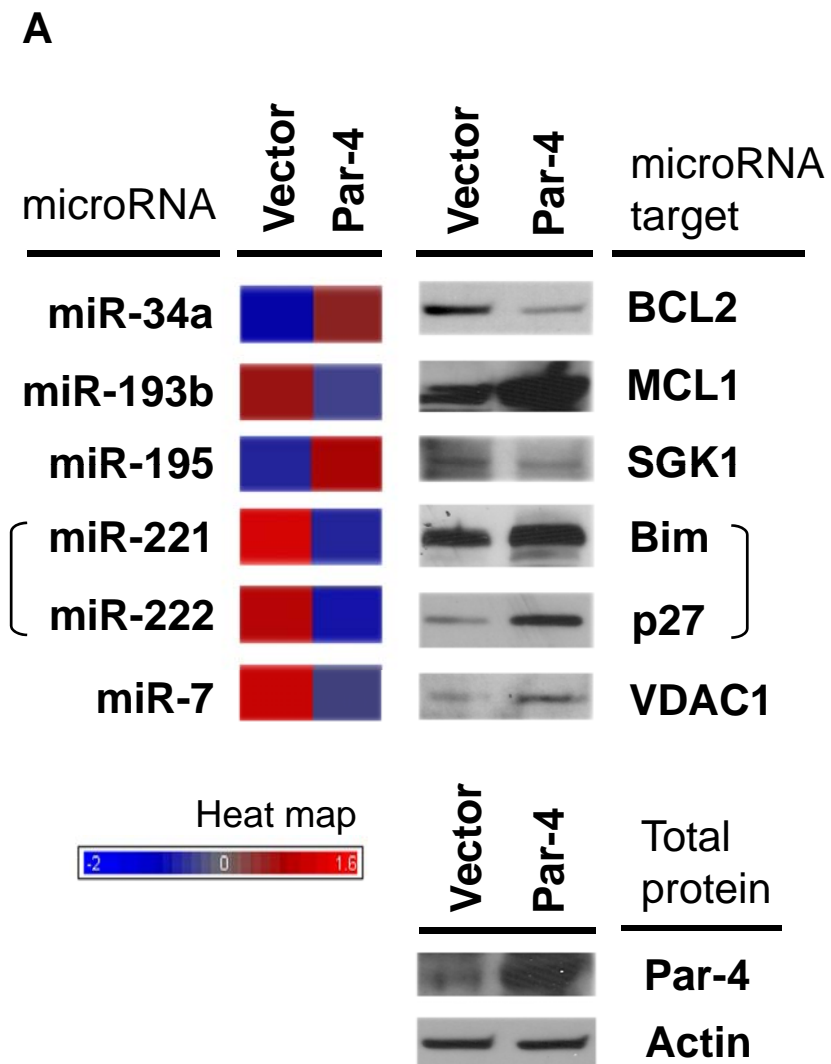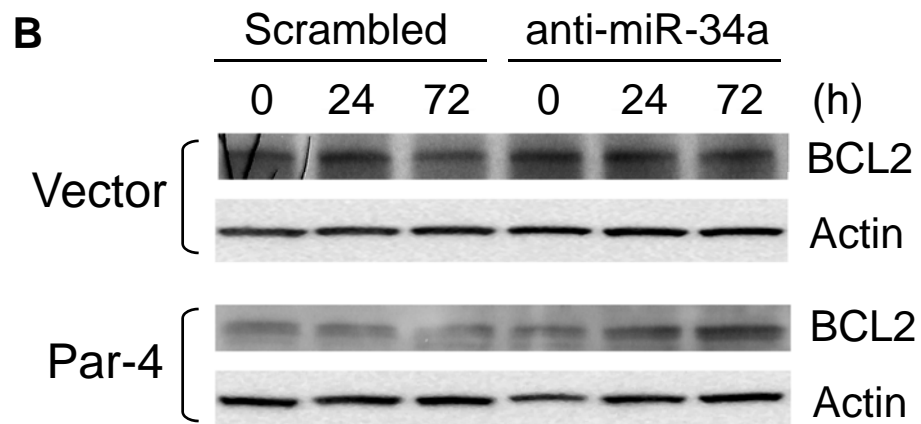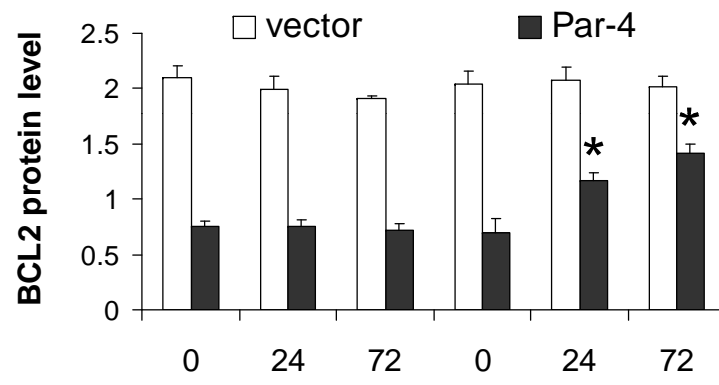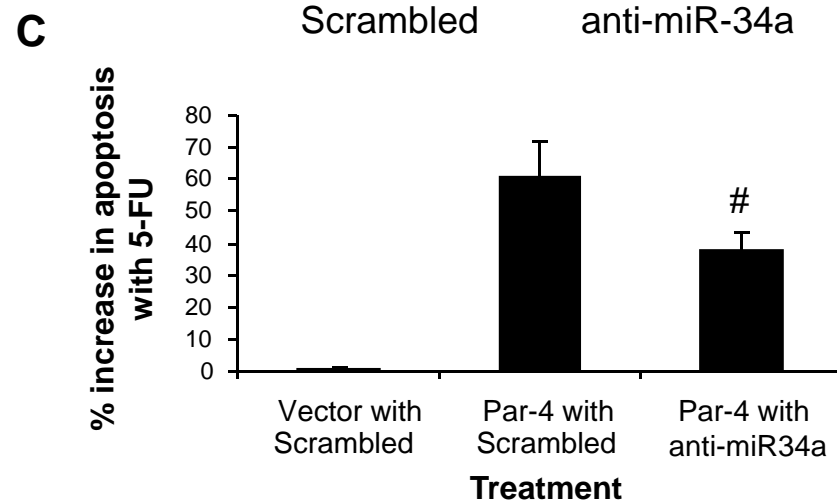

Supplement: MOESM18 [file 9555110]
